# Supplementary material
Source: PubMed Central journal article supplement (PMC2909661)

Supplement Figure: Funnel plot of 13 trials included in the current meta-analysis. SE: standard error, RR: relative risk

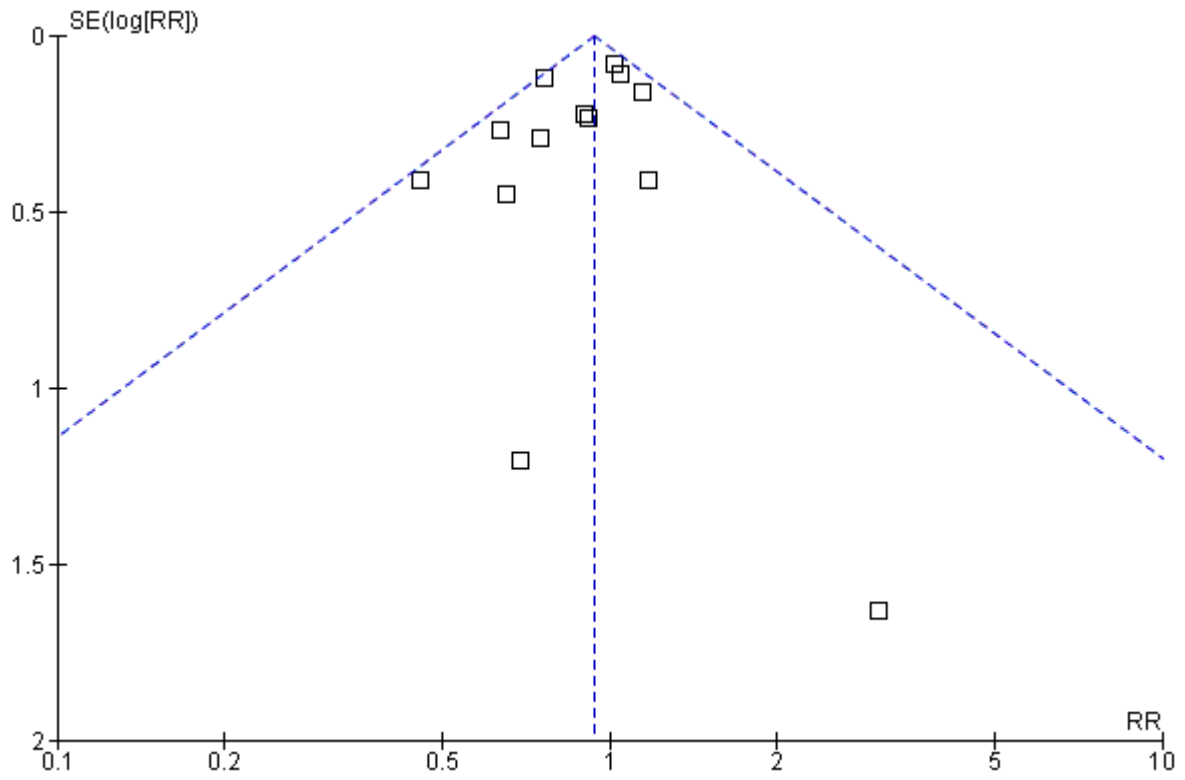

Supplement: NIHMS198960-supplement-supplement_1.pdf [file NIHMS198960-supplement-supplement_1.pdf]
